# Supplementary material for: The Relationship between Performance, Body Composition, and Processing Yield in Broilers: A Systematic Review and Meta-Regression
Source: MDPI journal article supplement (doi:10.3390/ani12192706), 2022-10-08
Supplement: s1 [file s1]

**Table S1.** Assessment of bias in the data used and in the weighed mean effect sizes.

| Response variable <sup>1</sup> | Bias in the dataset        |                                   | Bias in the weighed mean effect size                           |                        |
|--------------------------------|----------------------------|-----------------------------------|----------------------------------------------------------------|------------------------|
|                                | Trim-and-Fill <sup>2</sup> | Egger's test P value <sup>3</sup> | Estimate and 95%CI <sup>4</sup>                                | Inference <sup>5</sup> |
| FCR                            | 28                         | 0.7065                            | O: -0.0690 (-0.1483; +0.0103)<br>A: +0.0681 (-0.0065; +0.1427) | NEB                    |
| PFG                            | 0                          | 0.7144                            | O: -0.0744 (-0.1479; -0.0010)<br>A: -0.0744 (-0.1479; -0.0010) | NEB                    |
| CAR                            | 10                         | 0.1036                            | O: +0.1867 (-0.1261; +0.4996)<br>A: +0.4946 (+0.0861; +0.9030) | NEB                    |
| BLR                            | 15                         | <0.0001                           | O: -0.0072 (-0.0174; +0.0029)<br>A: -0.0216 (-0.0335; -0.0096) | B                      |
| MKV                            | 14                         | 0.0005                            | O: -0.0626 (-0.0996; -0.0255)<br>A: -0.1050 (-0.1487; -0.0613) | NEB                    |

<sup>1</sup> FCR, feed conversion ratio; PFG, protein-to-fat gain ratio; CAR, carcass yield (%); BLR, breast-to-leg quarters ratio; MKV, market value (\$/bird).

<sup>2</sup> Estimated number of missing data rows.

<sup>3</sup> Bias if P < 0.05.

<sup>4</sup> 95%CI, 95% confidence interval; O, original dataset; A, dataset including the set of missing values estimated with the Trim-and-Fill method.

<sup>5</sup> NEB, no evidence of bias; B, biased.
