# Supplementary material for: The Relationship between Performance, Body Composition, and Processing Yield in Broilers: A Systematic Review and Meta-Regression
Source: MDPI journal article supplement (doi:10.3390/ani12192706), 2022-10-08
Supplement: s1 [file s1]

## EFFECT SIZES ON CARCASS YIELD

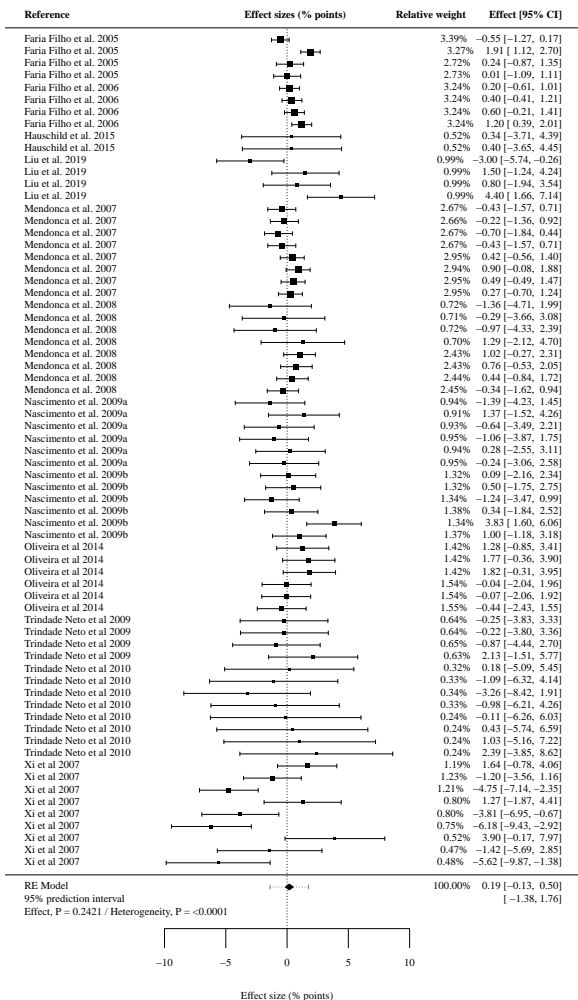

Black squares are the effect sizes. The size of the squares denote the relative weight given to that specific effect size.

The horizontal lines crossing the effect sizes represent the associated 95% confidence intervals.

The black diamond is the weighed mean effect size and the associated dotted line represents its 95% confidence interval.
